# Supplementary material for: The fate of pollutants in the co-composting of natural mineral biochar and animal manures in an intermittent aeration and mixing bioreactor (IAMB)
Source: Research Square preprint supplement (doi:10.21203/rs.3.rs-6743840/v1), 2025-06-11
Supplement: Supplementary file 1 [file 613b890e563650ddb80f72f6.docx]

**Tables.**

Table.1. Physicochemical properties of raw materials.

| Parameter | PS | CWM | PUM | NMB |
| --- | --- | --- | --- | --- |
| **pH** | 7.1± 0.38 | 7.8±0.11 | 7.6±0.86 | 7.3±0.94 |
| **Moisture,%** | 6.3 ± 2.03 | 70.6±5.4 | 14.3±2.36 | 5.4±1.1 |
| **C,%** | 48.6±5.9 | 41.6±1.8 | 40.28±0.36 | 18.21±2.3 |
| **N,%** | 0.56±0.07 | 2.1±0.25 | 3.85±0.14 | 1.2±1.1 |
| **P,%** | 0.02±0.007 | 1.54±0.01 | 2.1±0.08 | 0.16±0.08 |

Table.2. Run of expriments

| **Treatment** | **NMB,%** | **CWM/PUM** |
| --- | --- | --- |
| 1 | 0 | 1:3 |
| 2 | 0 | 1:1 |
| 3 | 0 | 3:1 |
| 4 | 5 | 1:3 |
| 5 | 5 | 1:1 |
| 6 | 5 | 3:1 |
| 7 | 10 | 1:3 |
| 8 | 10 | 1:1 |
| 9 | 10 | 3:1 |
| 10 | 15 | 1:3 |
| 11 | 15 | 1:1 |
| 12 | 15 | 3:1 |

Table 3. ANOVA results by response surface methodology in ANBC-containing treatment

| **Parameter** | **Model** | **Final equation** | **SD.** | **Accuracy.**  **Precision** | **R2** | **Adj.R2** | **Sum squares** | **Mean squares** |
| --- | --- | --- | --- | --- | --- | --- | --- | --- |
| pH (Initial) | Linear | = +7.67 +0.023A+0.17B | 0.14 | 4.95 | 0.61 | 0.49 | 0.11 | 0.021 |
| pH (Final) | Quadratic | =+8.29-0.063A + 0.095B-0.048AB +0.097A2 –0.098 B2 | 0.034 | 14.28 | 0.97 | 0.92 | 0.13 | 0.025 |
| Cumulative temperature,°c | Linear | = +979.44 – 34.5 A + 41.33 B | 14.57 | 19.91 | 0.94 | 0.92 | 17397.17 | 8696.08 |
| Conc.TOC ,% | Quadratic | =+23.72+0.53A+1.63B++0.26AB+1.27B2 | 0.15 | 37.66 | 0.99 | 0.99 | 21.17 | 5.29 |
| Conc. Zn, mg/kg | 2FI | =+250.34-40.79A-66.44B-18.6AB | 8.01 | 40.18 | 0.99 | 0.98 | 37853.54 | 12617.85 |
| Conc. Cu, mg/kg | Quadratic | =+86.97-16.27A+23.38B-9.95AB+52.44B2 | 6.37 | 24.91 | 0.98 | 0.97 | 10763.92 | 2690.98 |
| Conc. Cr, mg/kg | Quadratic | = +44.27-4.33A-9.79B-18.51B2 | 1.39 | 39.82 | 0.99 | 0.98 | 1372.7 | 457.57 |
